# Supplementary material for: Benefits, equity, and sustainability of community rainwater harvesting structures: An assessment based on farm scale social survey
Source: Frontiers journal article supplement (doi:10.3389/fenvs.2022.1043896), 2022-11-30
Supplement: Data_Sheet_1.docx [file Data_Sheet_1.docx]

Supplementary Material

Table A.1. Villages selected for survey

| SUB_DISTRI | TYPE | STATE | CENSUS_COD | NAME | DISTRICT | type |
| --- | --- | --- | --- | --- | --- | --- |
| Gondal | Village | Gujarat | 2409001000683100 | Bandhiya | Rajkot | D/s |
| Jasdan | Village | Gujarat | 2409000900673100 | Barvala | Rajkot | U/S |
| Gondal | Village | Gujarat | 2409001000682900 | Dadva Hamirpara* | Rajkot | M/s |
| Gondal | Village | Gujarat | 2409001000682900 | Dadva Hamirpara* | Rajkot | M/s |
| Jasdan | Village | Gujarat | 2409000900678800 | Dodiyala | Rajkot | D/s |
| Jasdan | Village | Gujarat | 2409000900675700 | Gadhadiya (Jas) | Rajkot | U/S |
| Jasdan | Village | Gujarat | 2409000900677100 | Jangvad | Rajkot | M/s |
| Jasdan | Town | Gujarat | 2409000940905000 | Jasdan | Rajkot | M/s |
| Jasdan | Village | Gujarat | 2409000900678000 | Jivapar | Rajkot | D/s |
| Kotda Sangani | Village | Gujarat | 2409000800667500 | Juna Rajpipla | Rajkot | M/s |
| Babra | Village | Gujarat | 2413000200906900 | Kalorana | Amreli | U/S |
| Jasdan | Village | Gujarat | 2409000900672800 | Kanesara | Rajkot | U/S |
| Gondal | Village | Gujarat | 2409001000685600 | Karmal Kotda | Rajkot | D/s |
| Babra | Village | Gujarat | 2413000200907600 | Karnuki | Amreli | M/s |
| Jasdan | Village | Gujarat | 2409000900673500 | Lalavadar | Rajkot | U/S |
| Jasdan | Village | Gujarat | 2409000900673400 | Lilapur | Rajkot | U/S |
| Jasdan | Village | Gujarat | 2409000900677200 | Panchavada | Rajkot | D/s |
| Kotda Sangani | Village | Gujarat | 2409000800668300 | Pipaliya Karmal | Rajkot | D/s |
| Jasdan | Village | Gujarat | 2409000900677800 | Pratappur | Rajkot | D/s |
| Jasdan | Village | Gujarat | 2409000900672600 | Ramaliya | Rajkot | U/S |
| Rajkot | Village | Gujarat | 2409000600659800 | Sardhar | Rajkot | U/S |
| Gondal | Village | Gujarat | 2409001000684400 | Shrinathgadh | Rajkot | D/s |
| Chotila | Village | Gujarat | 2408000700602100 | Vadali | Surendranagar | U/S |
| Jasdan | Village | Gujarat | 2409000900675200 | Virnagar | Rajkot | M/s |

** We replaced Jasdan (being a town) with Vavda village. 24 villages selected [dadva hamirpara being large occurs twice as two hamlets were selected from the village]*

Table A.2. Overall proportion marginal, small, semi-medium and large farmers in the region

|  | **Proportion** | | | | **Numbers** | | | |
| --- | --- | --- | --- | --- | --- | --- | --- | --- |
|  | **Marginal** | **Small** | **Semi medium** | **large** | **Marginal** | **Small** | **Semi medium** | **large** |
| Gondal | 22.8% | 44.3% | 25.3% | 7.5% | 5 | 9 | 5 | 2 |
| Jasdan | 25.5% | 37.8% | 27.3% | 9.3% | 5 | 8 | 5 | 2 |
| Kotda Sangani | 21.5% | 46.0% | 24.6% | 7.9% | 4 | 9 | 5 | 2 |
| Rajkot | 27.0% | 42.0% | 24.0% | 7.0% | 5 | 8 | 5 | 1 |
| Babra | 22.0% | 34.8% | 31.6% | 11.5% | 4 | 7 | 6 | 2 |
| Chotila | 21.6% | 35.7% | 29.2% | 13.5% | 4 | 7 | 6 | 3 |

* Marginal < 1 ha; Small 1-2 ha; Semi medium 2-4 ha and Large >4 ha

Table A.3. Descriptive statistics of the number of farmers surveyed for each village with reported median, min and max of total and working CDs in the village with number of farmers (and % of village population) reported benefitting from CDs,

|  | **Total farmers** | **Median (Total CDs)** | **Min-Max** | **Median (working CDs)** | **Min-Max** | **Farmers Benefiting (frequency)** | **% of village population** |
| --- | --- | --- | --- | --- | --- | --- | --- |
| Bandhiya | 21 | 5 | 2-12 | 2 | 1-10 | 5 | 23.8% |
| Barvala | 20 | 10 | 7-15 | 4 | 2-14 | 14 | 70.0% |
| Dadva Hamirpara | 40 | 12 | 3-70 | 6 | 2-25 | 31 | 77.5% |
| Dodiyala | 20 | 9 | 5-15 | 7 | 0-15 | 12 | 60.0% |
| Gadhadiya (Jas) | 20 | 8 | 5-25 | 4 | 0-10 | 9 | 45.0% |
| Jangvad | 20 | 7 | 2-40 | 5 | 0-40 | 9 | 45.0% |
| Jivapar | 21 | 40 | 5-50 | 20 | 1-50 | 11 | 52.4% |
| Juna Rajpipla | 20 | 14 | 8-30 | 10 | 3-20 | 19 | 95.0% |
| Kalorana | 22 | 6 | 1-25 | 4 | 0-20 | 7 | 31.8% |
| Kanesara | 20 | 10 | 1-30 | 5 | 1-30 | 11 | 55.0% |
| Karmal Kotda | 25 | 4 | 1-7 | 3 | 0-4 | 9 | 36.0% |
| Karnuki | 21 | 10 | 2-30 | 3 | 2-30 | 18 | 85.7% |
| Lalavadar | 20 | 10 | 7-20 | 7 | 3-15 | 20 | 100.0% |
| Lilapur | 20 | 15 | 2-21 | 5 | 0-15 | 11 | 55.0% |
| Panchavada | 20 | 10 | 1-25 | 10 | 1-25 | 8 | 40.0% |
| Pipaliya Karmal | 20 | 8 | 6-20 | 4 | 3-18 | 16 | 80.0% |
| Pratappur | 20 | 34 | 15-36 | 29 | 12-36 | 17 | 85.0% |
| Ramaliya | 20 | 10 | 7-15 | 5 | 2-12 | 17 | 85.0% |
| Sardhar | 20 | 10 | 7-15 | 8 | 2-12 | 18 | 90.0% |
| Shrinathgadh | 22 | 10 | 5-28 | 3 | 0-10 | 12 | 54.5% |
| Vadali | 20 | 3 | 3-4 | 2 | 1-3 | 18 | 90.0% |
| Vavda | 21 | 3 | 1-3 | 0 | 0-0 | 0 | 0.0% |
| Virnagar | 19 | 20 | 5-70 | 12 | 0-70 | 7 | 36.8% |

Table A.4. Frequency of check dams constructed during different years

| Time period | Freq | % of total |
| --- | --- | --- |
| 1955-1990 | **93** | **18.9** |
| 1990-1995 | **32** | **6.5** |
| 1995-2000 | **78** | **15.9** |
| 2000-2005 | **123** | **25.0** |
| 2005-2010 | **94** | **19.1** |
| 2010-2015 | **55** | **11.2** |
| 2015-2020 | **17** | **3.5** |
